# Supplementary material for: Modulating hardness in Sc2(Ru5−xTMx)B4 through empirical considerations and computational analysis
Source: Royal Society of Chemistry journal article supplement (doi:10.1039/d1tc05320e), 2022-01-01
Supplement: d1tc05320e1.pdf [file d1tc05320e1.pdf]

## SUPPORTING INFORMATION

### **Modulating Hardness in $\text{Sc}_2(\text{Ru}_{5-x}\text{TM}_x)\text{B}_4$ through Empirical Considerations and Computational Analysis**

Jacob C. Hickey and Jakoah Brgoch\*

*Department of Chemistry, University of Houston, Houston, Texas 77204, United States*  
*Texas Center for Superconductivity, University of Houston, Houston, Texas 77024, United States*

Table S1. Selected Crystallographic Data for Sc<sub>2</sub>Ru<sub>5</sub>B<sub>4</sub> and Sc<sub>2</sub>(Ru<sub>4.2</sub>Re<sub>0.8</sub>)B<sub>4</sub>

| Formula                                                                                                  | Sc <sub>2</sub> Ru <sub>5</sub> B <sub>4</sub>                  | Sc <sub>2</sub> (Ru <sub>4.2</sub> Re <sub>0.8</sub> )B <sub>4</sub> |
|----------------------------------------------------------------------------------------------------------|-----------------------------------------------------------------|----------------------------------------------------------------------|
| Mass (g mol <sup>-1</sup> )                                                                              | 1277.02                                                         | 1412.48                                                              |
| Space group; <i>Z</i>                                                                                    | <i>Pbam</i> (55); 2                                             | <i>Pbam</i> (55); 2                                                  |
| <i>a</i> (Å)                                                                                             | 8.4743(2)                                                       | 8.486(1)                                                             |
| <i>b</i> (Å)                                                                                             | 9.9738(2)                                                       | 9.984(1)                                                             |
| <i>c</i> (Å)                                                                                             | 2.9985(1)                                                       | 3.0197(4)                                                            |
| <i>V</i> (Å <sup>3</sup> )                                                                               | 253.44(1)                                                       | 255.86(6)                                                            |
| crystal color, shape                                                                                     | gray, plate                                                     | gray, plate                                                          |
| data collection temp. (K)                                                                                | 296                                                             | 296                                                                  |
| radiation source, λ (Å)                                                                                  | Mo K, 0.71073                                                   | Mo K, 0.71073                                                        |
| ρ <sub>calc</sub> (g cm <sup>-3</sup> )                                                                  | 8.367                                                           | 9.167                                                                |
| μ (mm <sup>-1</sup> )                                                                                    | 16.85                                                           | 33.14                                                                |
| absorption correction                                                                                    | multi-scan                                                      | analytical                                                           |
| θ <sub>min</sub> , θ <sub>max</sub>                                                                      | 6.31, 56.63                                                     | 6.31, 58.10                                                          |
| refinement method                                                                                        | <i>F</i> <sup>2</sup>                                           | <i>F</i> <sup>2</sup>                                                |
| <i>hkl</i> ranges                                                                                        | -11 ≤ <i>h</i> ≤ 11<br>-13 ≤ <i>k</i> ≤ 13<br>-4 ≤ <i>l</i> ≤ 4 | 0 ≤ <i>h</i> ≤ 11<br>0 ≤ <i>k</i> ≤ 13<br>0 ≤ <i>l</i> ≤ 4           |
| no. of reflections; <i>R</i> <sub>int</sub>                                                              | 3974; 0.0292                                                    | 442; 0                                                               |
| no. of unique reflections                                                                                | 369                                                             | 395                                                                  |
| no. of parameters                                                                                        | 37                                                              | 31                                                                   |
| <i>R</i> ( <i>F</i> ) for <i>F</i> <sub>o</sub> <sup>2</sup> > 4σ ( <i>F</i> <sub>o</sub> <sup>2</sup> ) | 0.0182                                                          | 0.0161                                                               |
| <i>R</i> <sub>w</sub> ( <i>F</i> <sub>o</sub> <sup>2</sup> )                                             | 0.05                                                            | 0.0371                                                               |
| Goodness of fit                                                                                          | 1.028                                                           | 1.151                                                                |
| Δρ <sub>max</sub> , Δρ <sub>min</sub> (e <sup>-</sup> /Å <sup>3</sup> )                                  | 0.75, -1.00                                                     | 1.34, -1.01                                                          |

Table S2. Equivalent isotropic displacement parameters for Sc<sub>2</sub>Ru<sub>5</sub>B<sub>4</sub> and Sc<sub>2</sub>(Ru<sub>4</sub>Re)B<sub>4</sub>

| Compound                                           | Atom | Wyckoff | <i>x</i>   | <i>y</i>   | <i>z</i> | <i>U</i> <sub>equiv.</sub> | Occ.     |
|----------------------------------------------------|------|---------|------------|------------|----------|----------------------------|----------|
| (a) Sc <sub>2</sub> Ru <sub>5</sub> B <sub>4</sub> | Sc   | 4h      | 0.8424(1)  | 0.3187(1)  | 0.5      | 0.0161(3)                  | 1        |
|                                                    | Ru   | 4g      | 0.59569(4) | 0.26207(4) | 1        | 0.0144(2)                  | 1        |
|                                                    | Ru   | 2c      | 1          | 0.5        | 0        | 0.0141(2)                  | 0.998(3) |
|                                                    | Ru   | 4g      | 0.33922(4) | 0.45209(4) | 1        | 0.0147(2)                  | 1        |

|                                                                          |    |    |            |            |     |                       |          |
|--------------------------------------------------------------------------|----|----|------------|------------|-----|-----------------------|----------|
|                                                                          | B  | 4h | 0.1488(6)  | 0.3973(6)  | 0.5 | 0.015(1)              | 1        |
|                                                                          | B  | 4h | 0.5347(8)  | 0.4104(7)  | 0.5 | 0.022(1)              | 1        |
| (b) Sc <sub>2</sub> (Ru <sub>4.2</sub> Re <sub>0.8</sub> )B <sub>4</sub> | Sc | 4h | 0.8424(1)  | 0.6814(1)  | 0.5 | 0.0050(2)             | 1        |
|                                                                          | Ru | 4g | 0.34037(3) | 0.54696(3) | 1   | 0.0033(1)             | 0.601(3) |
|                                                                          | Ru | 2c | 1          | 0.5        | 0   | 0.0028(2)             | 1        |
|                                                                          | Ru | 4g | 0.59602(5) | 0.73909(4) | 1   | 0.0031(2)             | 1        |
|                                                                          | Re | 4g | 0.34037(3) | 0.54696(3) | 1   | 0.0033(1)             | 0.399(3) |
|                                                                          | B  | 4h | 0.5352(7)  | 0.5898(6)  | 0.5 | 0.005(1) <sup>a</sup> | 1        |
|                                                                          | B  | 4h | 0.149(6)   | 0.6009(6)  | 0.5 | 0.006(1) <sup>a</sup> | 1        |

<sup>a</sup>modeled with isotropic atomic displacement parameters

Table S3. Refined harmonic displacement parameters for Sc<sub>2</sub>Ru<sub>5</sub>B<sub>4</sub> and Sc<sub>2</sub>(Ru<sub>4</sub>Re)B<sub>4</sub>

| Compound                                                                 | Site | $U_{11}$  | $U_{22}$  | $U_{33}$  | $U_{23}$ | $U_{13}$ | $U_{12}$   |
|--------------------------------------------------------------------------|------|-----------|-----------|-----------|----------|----------|------------|
| (a) Sc <sub>2</sub> Ru <sub>5</sub> B <sub>4</sub>                       | Sc1  | 0.0150(5) | 0.0182(5) | 0.0152(5) | 0        | 0        | -0.0013(3) |
|                                                                          | Ru1  | 0.0141(3) | 0.0142(3) | 0.0149(3) | 0        | 0        | -0.0002(1) |
|                                                                          | Ru2  | 0.0135(3) | 0.0143(4) | 0.0145(3) | 0        | 0        | 0.0005(2)  |
|                                                                          | Ru3  | 0.0144(3) | 0.0148(3) | 0.0150(3) | 0        | 0        | 0.0002(1)  |
|                                                                          | B1   | 0.013(2)  | 0.017(3)  | 0.013(3)  | 0        | 0        | -0.001(2)  |
|                                                                          | B2   | 0.025(3)  | 0.021(3)  | 0.022(3)  | 0        | 0        | 0.003(2)   |
| (b) Sc <sub>2</sub> (Ru <sub>4.2</sub> Re <sub>0.8</sub> )B <sub>4</sub> | Sc1  | 0.0032(5) | 0.0081(5) | 0.0036(5) | 0        | 0        | 0.0006(4)  |
|                                                                          | Ru1  | 0.0026(2) | 0.0047(2) | 0.0028(2) | 0        | 0        | -0.0001(1) |
|                                                                          | Ru2  | 0.0015(3) | 0.0041(3) | 0.0027(3) | 0        | 0        | -0.0002(2) |
|                                                                          | Ru3  | 0.0024(2) | 0.0040(2) | 0.0030(2) | 0        | 0        | 0.0001(2)  |

Re1 0.0026(2) 0.0047(2) 0.0028(2) 0 0 -0.0001(1)

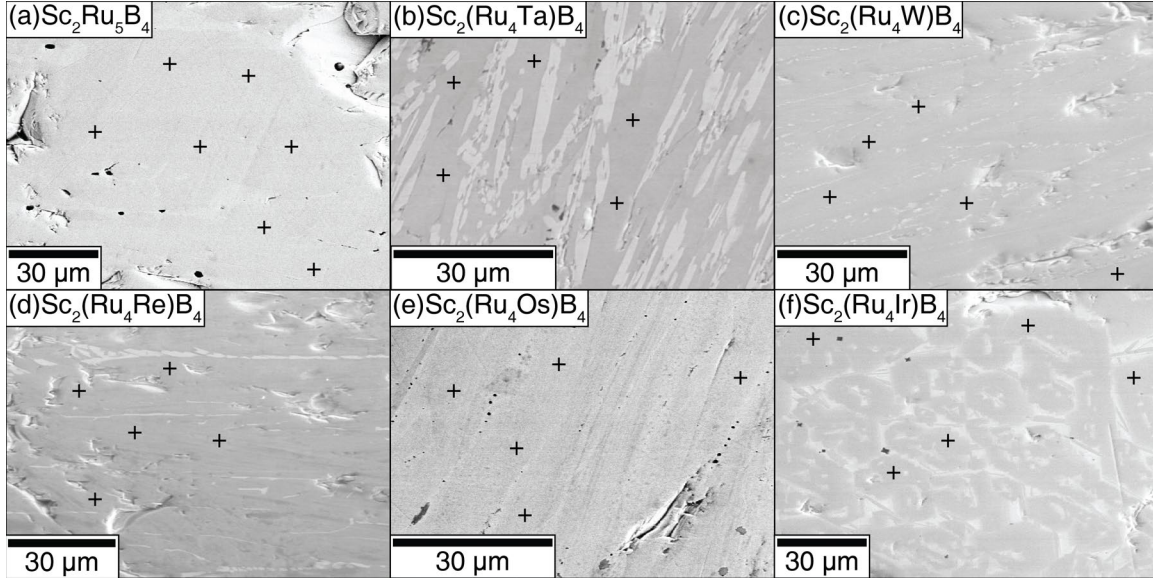

Figure S1: Backscattered electron micrographs of (a)  $\text{Sc}_2\text{Ru}_5\text{B}_4$ , (b)  $\text{Sc}_2(\text{Ru}_4\text{Ta})\text{B}_4$ , (c)  $\text{Sc}_2(\text{Ru}_4\text{W})\text{B}_4$ , (d)  $\text{Sc}_2(\text{Ru}_4\text{Re})\text{B}_4$ , (e)  $\text{Sc}_2(\text{Ru}_4\text{Os})\text{B}_4$ , and (f)  $\text{Sc}_2(\text{Ru}_4\text{Ir})\text{B}_4$ . Plus signs indicate the spots selected for EDS analysis.

Table S4. Unit Cell Parameters for  $\text{Sc}_2(\text{Ru}_4\text{TM})\text{B}_4$  ( $\text{TM} = \text{Ru}, \text{Ta}, \text{W}, \text{Mo}, \text{Re}, \text{Os}, \text{and Ir}$ )

| sample                               | a, Å      | b, Å       | c, Å      | volume, Å <sup>3</sup> | $\alpha$ | $\beta$ | $\gamma$ |
|--------------------------------------|-----------|------------|-----------|------------------------|----------|---------|----------|
| $\text{Sc}_2\text{Ru}_5\text{B}_4$   | 8.4865(2) | 2.9930(8)  | 9.9714(2) | 253.277(8)             | 90.000   | 90.000  | 90.000   |
| $\text{Sc}_2\text{Ru}_4\text{TaB}_4$ | 8.5049(9) | 3.0162(2)  | 9.9588(8) | 255.47(2)              | 90.000   | 90.000  | 90.000   |
| $\text{Sc}_2\text{Ru}_4\text{WB}_4$  | 8.5319(2) | 3.02155(7) | 9.9617(2) | 256.813(8)             | 90.000   | 90.000  | 90.000   |
| $\text{Sc}_2\text{Ru}_4\text{ReB}_4$ | 8.4667(2) | 3.00785(9) | 9.964(3)  | 253.76(1)              | 90.000   | 90.000  | 90.000   |
| $\text{Sc}_2\text{Ru}_4\text{OsB}_4$ | 8.4950(4) | 2.9979(1)  | 9.986(4)  | 254.33(1)              | 90.000   | 90.000  | 90.000   |
| $\text{Sc}_2\text{Ru}_4\text{IrB}_4$ | 8.5937(2) | 2.98087(8) | 9.9286(6) | 254.34(1)              | 90.000   | 90.000  | 90.000   |

Table S5. Ideal stress and strain values of  $\text{Sc}_2\text{Ru}_5\text{B}_4$  for various tensile systems derived from stress-strain curves

| applied tensile | ideal stress (Gpa) | strain |
|-----------------|--------------------|--------|
| [100]           | 32.7               | 0.27   |
| [010]           | 46.5               | 0.32   |
| [001]           | 34.2               | 0.24   |
| [101]           | 28.4               | 0.17   |
| [110]           | 27.4               | 0.17   |

|       |      |      |
|-------|------|------|
| [111] | 23.4 | 0.17 |
|-------|------|------|

Table S6. Ideal stress and strain values of Sc<sub>2</sub>Ru<sub>5</sub>B<sub>4</sub> for various shear systems derived from stress-strain curves

| applied tensile | ideal stress (Gpa) | strain |
|-----------------|--------------------|--------|
| (100)[001]      | 21.1               | 0.30   |
| (100)[010]      | 18.3               | 0.21   |
| (100)[011]      | 17.2               | 0.23   |
| (100)[0-11]     | 17.2               | 0.23   |
| (001)[100]      | 21.1               | 0.30   |
| (001)[110]      | 18.6               | 0.23   |
| (001)[010]      | 20.0               | 0.21   |
| (001)[-100]     | 21.1               | 0.30   |
| (001)[-110]     | 18.6               | 0.23   |
| (011)[01-1]     | 24.2               | 0.30   |
| (011)[100]      | 17.2               | 0.23   |
| (011)[1-11]     | 22.5               | 0.25   |
| (011)[11-1]     | 20.6               | 0.30   |
| (110)[-110]     | 24.5               | 0.49   |
| (110)[001]      | 18.6               | 0.23   |
| (110)[1-11]     | 21.8               | 0.32   |
| (110)[1-10]     | 26.2               | 0.35   |
| (010)[001]      | 20.0               | 0.21   |
| (010)[-100]     | 18.3               | 0.21   |
| (010)[101]      | 18.6               | 0.17   |
| (111)[-110]     | 21.8               | 0.32   |
| (111)[-101]     | 20.2               | 0.21   |
| (111)[01-1]     | 20.6               | 0.30   |
| (111)[0-11]     | 22.5               | 0.25   |
| (111)[11-2]     | 14.7               | 0.14   |
| (111)[-1-12]    | 22.0               | 0.23   |

Table S7. Ideal stress and strain values of Sc<sub>2</sub>(Ru<sub>4</sub>Ta)B<sub>4</sub> for various shear systems derived from stress-strain curves

| applied tensile | ideal stress (Gpa) | strain |
|-----------------|--------------------|--------|
| (100)[001]      | 21.4               | 0.25   |
| (100)[010]      | 17.7               | 0.14   |
| (100)[011]      | 19.3               | 0.21   |
| (100)[0-11]     | 19.3               | 0.21   |

|              |      |      |
|--------------|------|------|
| (001)[100]   | 21.4 | 0.25 |
| (001)[110]   | 16.2 | 0.14 |
| (001)[010]   | 19.4 | 0.17 |
| (001)[-100]  | 21.4 | 0.25 |
| (001)[-110]  | 16.2 | 0.14 |
| (011)[01-1]  | 20.8 | 0.32 |
| (011)[100]   | 19.3 | 0.21 |
| (011)[1-11]  | 22.4 | 0.23 |
| (011)[11-1]  | 19.7 | 0.39 |
| (110)[-110]  | 24.4 | 0.42 |
| (110)[001]   | 16.2 | 0.14 |
| (110)[1-11]  | 20.1 | 0.32 |
| (110)[1-10]  | 22.0 | 0.39 |
| (010)[001]   | 19.7 | 0.17 |
| (010)[-100]  | 17.7 | 0.14 |
| (010)[101]   | 20.0 | 0.17 |
| (111)[-110]  | 20.1 | 0.32 |
| (111)[-101]  | 19.7 | 0.17 |
| (111)[01-1]  | 19.7 | 0.39 |
| (111)[0-11]  | 22.4 | 0.23 |
| (111)[11-2]  | 21.2 | 0.23 |
| (111)[-1-12] | 20.7 | 0.21 |

Table S8. Ideal stress and strain values of  $\text{Sc}_2(\text{Ru}_4\text{W})\text{B}_4$  for various shear systems derived from stress-strain curves

| applied tensile | ideal stress (Gpa) | strain |
|-----------------|--------------------|--------|
| (100)[001]      | 20.4               | 0.23   |
| (100)[010]      | 19.3               | 0.14   |
| (100)[011]      | 20.8               | 0.19   |
| (100)[0-11]     | 20.8               | 0.19   |
| (001)[100]      | 20.4               | 0.23   |
| (001)[110]      | 19.7               | 0.17   |
| (001)[010]      | 21.6               | 0.19   |
| (001)[-100]     | 20.4               | 0.23   |
| (001)[-110]     | 19.6               | 0.17   |
| (011)[01-1]     | 23.5               | 0.32   |
| (011)[100]      | 20.8               | 0.19   |
| (011)[1-11]     | 23.5               | 0.21   |
| (011)[11-1]     | 20.6               | 0.35   |
| (110)[-110]     | 24.6               | 0.42   |

|              |      |      |
|--------------|------|------|
| (110)[001]   | 19.7 | 0.17 |
| (110)[1-11]  | 22.2 | 0.32 |
| (110)[1-10]  | 25.2 | 0.37 |
| (010)[001]   | 21.6 | 0.19 |
| (010)[-100]  | 19.3 | 0.14 |
| (010)[101]   | 21.6 | 0.19 |
| (111)[-110]  | 22.2 | 0.32 |
| (111)[-101]  | 24.5 | 0.23 |
| (111)[01-1]  | 20.6 | 0.35 |
| (111)[0-11]  | 23.5 | 0.21 |
| (111)[11-2]  | 22.4 | 0.21 |
| (111)[-1-12] | 24.0 | 0.23 |

Table S9. Ideal stress and strain values of  $\text{Sc}_2(\text{Ru}_4\text{Re})\text{B}_4$  for various shear systems derived from stress-strain curves

| applied tensile | ideal stress (Gpa) | strain |
|-----------------|--------------------|--------|
| (100)[001]      | 21.6               | 0.25   |
| (100)[010]      | 20.9               | 0.19   |
| (100)[011]      | 19.4               | 0.17   |
| (100)[0-11]     | 19.4               | 0.17   |
| (001)[100]      | 21.6               | 0.25   |
| (001)[110]      | 21.0               | 0.19   |
| (001)[010]      | 20.9               | 0.19   |
| (001)[-100]     | 21.6               | 0.25   |
| (001)[-110]     | 21.0               | 0.19   |
| (011)[01-1]     | 24.0               | 0.32   |
| (011)[100]      | 19.4               | 0.17   |
| (011)[1-11]     | 23.2               | 0.21   |
| (011)[11-1]     | 20.9               | 0.28   |
| (110)[-110]     | 23.5               | 0.42   |
| (110)[001]      | 21.0               | 0.19   |
| (110)[1-11]     | 22.6               | 0.32   |
| (110)[1-10]     | 27.5               | 0.37   |
| (010)[001]      | 20.9               | 0.19   |
| (010)[-100]     | 20.9               | 0.19   |
| (010)[101]      | 21.8               | 0.19   |
| (111)[-110]     | 22.6               | 0.32   |
| (111)[-101]     | 23.3               | 0.21   |
| (111)[01-1]     | 20.9               | 0.28   |
| (111)[0-11]     | 23.2               | 0.21   |

|              |      |      |
|--------------|------|------|
| (111)[11-2]  | 24.4 | 0.21 |
| (111)[-1-12] | 24.1 | 0.23 |

Table S10. Ideal stress and strain values of  $\text{Sc}_2(\text{Ru}_4\text{Os})\text{B}_4$  for various shear systems derived from stress-strain curves

| applied tensile | ideal stress (Gpa) | strain |
|-----------------|--------------------|--------|
| (100)[001]      | 19.4               | 0.23   |
| (100)[010]      | 19.5               | 0.21   |
| (100)[011]      | 16.2               | 0.14   |
| (100)[0-11]     | 16.3               | 0.14   |
| (001)[100]      | 19.4               | 0.23   |
| (001)[110]      | 18.8               | 0.23   |
| (001)[010]      | 20.3               | 0.21   |
| (001)[-100]     | 19.4               | 0.23   |
| (001)[-110]     | 18.8               | 0.23   |
| (011)[01-1]     | 23.3               | 0.30   |
| (011)[100]      | 16.3               | 0.14   |
| (011)[1-11]     | 21.5               | 0.21   |
| (011)[11-1]     | 20.5               | 0.28   |
| (110)[-110]     | 23.1               | 0.42   |
| (110)[001]      | 18.8               | 0.23   |
| (110)[1-11]     | 21.6               | 0.32   |
| (110)[1-10]     | 26.8               | 0.35   |
| (010)[001]      | 20.3               | 0.21   |
| (010)[-100]     | 19.5               | 0.21   |
| (010)[101]      | 19.5               | 0.19   |
| (111)[-110]     | 21.6               | 0.32   |
| (111)[-101]     | 19.9               | 0.19   |
| (111)[01-1]     | 20.5               | 0.28   |
| (111)[0-11]     | 21.5               | 0.21   |
| (111)[11-2]     | 14.3               | 0.14   |
| (111)[-1-12]    | 21.6               | 0.23   |

Table S11. Ideal stress and strain values of  $\text{Sc}_2(\text{Ru}_4\text{Ir})\text{B}_4$  for various shear systems derived from stress-strain curves

| applied tensile | ideal stress (Gpa) | strain |
|-----------------|--------------------|--------|
| (100)[001]      | 21.5               | 0.35   |
| (100)[010]      | 9.7                | 0.12   |
| (100)[011]      | 16.6               | 0.21   |



|              |      |      |
|--------------|------|------|
| (100)[0-11]  | 16.6 | 0.21 |
| (001)[100]   | 21.5 | 0.35 |
| (001)[110]   | 18.8 | 0.25 |
| (001)[010]   | 12.7 | 0.14 |
| (001)[-100]  | 21.1 | 0.35 |
| (001)[-110]  | 18.8 | 0.25 |
| (011)[01-1]  | 26.7 | 0.30 |
| (011)[100]   | 16.6 | 0.21 |
| (011)[1-11]  | 20.5 | 0.28 |
| (011)[11-1]  | 21.4 | 0.32 |
| (110)[-110]  | 26.8 | 0.51 |
| (110)[001]   | 18.4 | 0.23 |
| (110)[1-11]  | 21.6 | 0.30 |
| (110)[1-10]  | 27.5 | 0.35 |
| (010)[001]   | 12.7 | 0.14 |
| (010)[-100]  | 9.8  | 0.12 |
| (010)[101]   | 8.9  | 0.10 |
| (111)[-110]  | 21.6 | 0.30 |
| (111)[-101]  | 19.4 | 0.17 |
| (111)[01-1]  | 21.4 | 0.32 |
| (111)[0-11]  | 20.5 | 0.28 |
| (111)[11-2]  | 10.0 | 0.12 |
| (111)[-1-12] | 19.5 | 0.25 |

---
